# Supplementary material for: Genome-wide association study for grain yield and component traits in bread wheat (Triticum aestivum L.)
Source: Front Genet. 2022 Aug 26;13:982589. doi: 10.3389/fgene.2022.982589 (PMC9458894; doi:10.3389/fgene.2022.982589)
Supplement: Supplementary file 2 [file Table1.XLSX]

## Sheet: List of genotypes
SN GTP	Genotype	Pedigree	Year	Accession type	Zone	Condition
1	AAI-W29	MRD/HP1008	-	Breeding line	NW-NE	IR-TS
2	AKAW5080	HW1081/MACS2496//AKAW-4287-5-4-7	-	Breeding line	CZ-PZ	IR-LS
3	AKAW5099	Sel-NHP-4	-	Breeding line	CZ-PZ	IR-TS
4	BRW3877	SOKOLL/3/PASTOR//HXL7573/2*BAU/4/WBLL4//OAX93.24.35	-	Breeding line	NW-NE	IR-TS
5	CG1029	HW2004/PHS725	2020	Variety	CZ	IR-LS
6	CG1034	HI1544/WR1743	-	Breeding line	CZ-PZ	IR-TS
7	CG1035	HD2932/WR1873	-	Breeding line	CZ-PZ	IR-LS
8	CG1036	HW2004/PHS832	-	Breeding line	CZ-PZ	RI-TS
9	CG1037	HI1544/HS485	-	Breeding line	CZ-PZ	IR-LS
10	DBW107	TUKURU/INQLAB 91	2015	Variety	NEPZ	IR-LS
11	DBW110	KIRITATI/4/2*SERI1B*2/3/KAUZ*2/BOW//KAUZ	2015	Variety	CZ	RI-TS
12	DBW290	QUAIU#1/5/KIRITATI/4/2*SERI.1B*2/3/KAUZ*2/BOW//KAUZ/6/BECARD	-	Breeding line	NWPZ	IR-LS
13	DBW296	SOKOLL/3/PASTOR//HXL7573/2*BAU/4/MASSIV/PPR47.89C	2022	Variety	NWPZ	RI-TS
14	DBW303	WBLL1*2/BRAMBLING/4/BABAX/LR42//BABAX*2/3/SHAMA*2/5/PBW343*2/KUKUNA*2/FRTL/PIFED	2021	Variety	NWPZ	IR-ES
15	DBW307	MUNAL*2/CHONTE	-	Breeding line	NW-NE	IR-TS
16	DBW310	WH542/DBW16	-	Breeding line	NW-NE	IR-TS
17	DBW311	HD2985/CBW38//CBW38	-	Breeding line	NW-NE	IR-TS
18	DBW312	HUW234/WH147	-	Breeding line	NW-NE	IR-TS
19	DBW313	REH/HARE/2*/BCN/3/CROC/AE.SQ(213)//PGO/4/HUITES/5/PBW585//PBW509/PBW581	-	Breeding line	NW-NE	IR-TS
20	DBW314	DBW87/DBW16	-	Breeding line	CZ-PZ	IR-TS
21	DBW316	DBW18/DBW66	-	Breeding line	NEPZ	IR-LS
22	DBW319	DUCULA/5/GOV/AZ//MUS/3/DODO/4/BOW/6/THELIN//2*ATTILA*2/PASTOR	-	Breeding line	NW-NE	IR-LS
23	DBW320	KRL236/DBW16	-	Breeding line	CZ-PZ	IR-LS
24	DBW321	DBW39/DL7882	-	Breeding line	NW-NE	RI-TS
25	DBW322	CIMMYT165/PBW585	-	Breeding line	NW-NE	RI-TS
26	DBW326	CROC_1AE.SQ(205)//BORL95/3/PRL/SARA//TSI	-	Breeding line	CZ-PZ	RI-TS
27	DBW327	NELOKI//SOKOLL/EXCALIBUR	2022	Variety	NWPZ	IR-ES
28	DBW328	NADI//TRCH/HUIRIVIS#1/3/NADI	-	Breeding line	NWPZ	IR-ES
29	DBW329	NGL/FRANCOLIN#1//FRNCLN/ROLF07	-	Breeding line	NWPZ	IR-ES
30	DBW331	MUTUS/AKURI//SUP152/BAJ#1	-	Breeding line	NWPZ	IR-ES
31	DBW332	MUTUS/ROLF07//MUCUY	-	Breeding line	NWPZ	IR-ES
32	DBW335	DBW17/KRL1-4	-	Breeding line	NW-NE	IR-LS
33	DBW39	ATTILA/HUI	2010	Variety	NEPZ	IR-TS
34	DBW88	KAUZ//ALTAR84/AOS/3/MILAN/KAUZ/4/HUITES	2014	Variety	NWPZ	IR-TS
35	GW322	PBW173/GW196	2002	Variety	CZ	IR-TS
36	GW513	PBW559/WR1873	2022	Variety	CZ	IR-TS
37	GW519	GW394/PBW519//AKAW4627	-	Breeding line	PZ	IR-LS
38	GW521	LBPY2005-6/DL788-2	-	Breeding line	CZ-PZ	IR-TS
39	GW522	GW157/PCE2555//FLW3/3/PHR1009	-	Breeding line	CZ-PZ	IR-TS
40	GW523	PED.CHEN/AE.SQ(TAUS)//BUC/KAUZPEWTI-1	-	Breeding line	CZ-PZ	IR-TS
41	GW525	HXL7573/2*BAU//WBLL1/3/GW411	-	Breeding line	CZ-PZ	IR-LS
42	GW528	AGA/4*YR70//CMH79A.955/3/SERI82/4/CPAN1905/J405/5/HD2808	-	Breeding line	CZ-PZ	RI-TS
43	HD2864	DL509-2/DL377-8	2005	Variety	CZ	IR-LS
44	HD2932	KAUZ/STAR//HD2643	2008	Variety	CZ-PZ	IR-LS
45	HD2967	ALD/CUC//URES/HD2160M/HD2278	2011	Variety	NW-NE	IR-TS
46	HD3043	PJN/BOW//OPATA*2/3CROC_1/AE.SQ(224)//OPATA	2012	Variety	NWPZ	RI-TS
47	HD3090	SFW/VAISHALI//UP2425	2014	Variety	PZ	IR-LS
48	HD3249	PBW343*2/KUKUNA//SRTU/3/PBW343*2/KHVAKI	2020	Variety	NEPZ	RI-TS
49	HD3293	HD2967/DBW46	2021	Variety	NEPZ	RI-TS
50	HD3298	CL1449/PBW343//CL882/HD2009	2021	Variety	NWPZ	IR-VLS
51	HD3331	31 ESWYT-135/3/HD2329/WR544//PBW343/NW3041	-	Breeding line	NWPZ	IR-LS
52	HD3332	PFAU/SERI.1B	-	Breeding line	NWPZ	IR-LS
53	HD3334	DBW50/WR2502	-	Breeding line	NWPZ	IR-LS
54	HD3348	MERCATO/VORB	-	Breeding line	NW-NE	IR-TS
55	HD3349	HD2932/HD3086	-	Breeding line	NW-NE	IR-TS
56	HD3350	HD3078/HD2781	-	Breeding line	NW-NE	IR-TS
57	HD3351	31 ESWYT-147/3/HW5028// HD2932/DW1309	-	Breeding line	NW-NE	IR-TS
58	HD3352	PBW343/DBW17//HD2687	-	Breeding line	NW-NE	IR-TS
59	HD3354	QUAIU#1/3/T.DICOCCONPI94625/AE.SQ(372)//3*PASTOR/4/QUAIU#2/5/VALI/6/BECARD/QUAIU#1	-	Breeding line	NW-NE	IR-TS
60	HD3355	VL849/NPBGR39//HD2967	-	Breeding line	NW-NE	IR-TS
61	HD3356	NIAW34/PHW12//43 IBWSN1187	-	Breeding line	NW-NE	IR-TS
62	HD3357	VL907/HD2967	-	Breeding line	NW-NE	IR-TS
63	HD3359	MP3288/K0911	-	Breeding line	CZ-PZ	IR-TS
64	HD3360	HD3086/HI1500	-	Breeding line	NW-NE	IR-LS
65	HD3362	DANPHE#1*2/3/T.DICOCCONPI94625/AE.SQ(372)//SHA4/CHIL/4/SHAKTI/5/VALI	-	Breeding line	NW-NE	IR-LS
66	HD3363	DL689/WR196//HW4022/DW1221	-	Breeding line	NW-NE	IR-LS
67	HD3364	CSW02/HD2932(YR15)	-	Breeding line	NW-NE	IR-LS
68	HD3368	HD2932/HD3086	-	Breeding line	NW-NE	RI-TS
69	HD3371	CL1705/HD2687	-	Breeding line	CZ-PZ	RI-TS
70	HD3376	NIAW34/PHW12//43RDIBWSN1187	-	Breeding line	CZ-PZ	IR-TS
71	HD3377	CROC_1/AE.SQ(210)//PBW343*2/KUKUNA/3/PBW343*2/KUKUNA/4/VALI/5/MANKU	-	Breeding line	CZ	IR-TS
72	HI1544	HINDI62/BOBWHITE/CPAN2099	2008	Variety	CZ	IR-TS
73	HI1563	MACS 2496*2/MC 10	2011	Variety	NEPZ	IR-LS
74	HI1628	FRET2*2/4/SNI/TRAP#1/3/KAUZ*2/TRAP//KAUZ/5/PFAU/WEAVER//BRAMBLING	2020	Variety	NWPZ	RI-TS
75	HI1634	GW322/PBW498	2021	Variety	CZ	IR-LS
76	HI1636	DL788-2/HW4032	2022	Variety	CZ	IR-TS
77	HI1637	GW366/K9465	-	Breeding line	CZ	IR-TS
78	HI1646	DANPHE/3/PBW343*2/KUKUNA//PBW343*2/KUKUNA	-	Breeding line	CZ	IR-LS
79	HI1647	HI1479/GW326	-	Breeding line	CZ-PZ	IR-TS
80	HI1648	HI1544/HW3026	-	Breeding line	CZ-PZ	IR-TS
81	HI1649	FRANCOLIN/HI1563//IND351	-	Breeding line	CZ-PZ	IR-TS
82	HI1650	Giant-3/HI1395	-	Breeding line	CZ-PZ	IR-TS
83	HI1651	HI1544/HW2640	-	Breeding line	CZ-PZ	IR-LS
84	HI1653	NADI/COPIO//NADI	-	Breeding line	CZ-PZ	RI-TS
85	HI1654	SOKOLL/3/PASTOR//HXL7573/2*BAU/4/PANDION//FILIN/2*PASTOR/3/BERKUT	-	Breeding line	CZ-PZ	RI-TS
86	HPW469	HPW89/VL867	-	Breeding line	NHZ	RF-TS
87	HPW470	NAC/TH.AC//3*MIRLO/BUC/4PASTOR	-	Breeding line	NHZ	RF-TS
88	HPW471	HPW236/VL900	-	Breeding line	NHZ	RF-TS
89	HPW472	HPW155/HD29	-	Breeding line	NHZ	RF-TS
90	HPW473	HPW155/PBW486	-	Breeding line	NHZ	RI-LS
91	HS675	HS240*2FLW20//HS240*2/FLW13	-	Breeding line	NHZ	RF-TS
92	HS676	VL907/DL460	-	Breeding line	NHZ	RF-TS
93	HS677	ID8900994W/VEE/3/CHEN/AES/HD2932	-	Breeding line	NHZ	RF-TS
94	HS678	VL907/HD2997	-	Breeding line	NHZ	RF-TS
95	HS679	VL907/DL640	-	Breeding line	NHZ	RI-LS
96	HS680	VL616/HD2733	-	Breeding line	NHZ	RI-LS
97	HS681	HEINESVII/HPW251//HS507	-	Breeding line	NHZ	RI-LS
98	HUW838	WBLL1*2/BRAMBLING/4/BABAX/LR42//BABAX*2/3/SHAMA*2/5/PBW343*2/KUKUNA*2/FRTL/PIFED	2022	Variety	NWPZ	RI-TS
99	HUW839	QUAIU#1/3/T.DICOCCONPI94625/AE.SQ(372)//3*PASTOR/4/QUAIU#2/5/VILLAJUAREZF2009/3/T.DICOCCONPI94625/AE.SQ(372)//3*PASTOR/4/WBLL1*2/BRAMBLING	-	Breeding line	NW-NE	IR-TS
100	HUW840	KINDE/4/CMH75A.66//H567.71/5*PVN/3/SERI	-	Breeding line	NW-NE	IR-TS
101	HUW843	FRANCOLIN/HUW206	-	Breeding line	NW-NE	RI-TS
102	JKW261	ISENGRAIN/KBIRD//MUNAL#1	2022	Variety	NWPZ	IR-LS
103	JKW270	ROLF07/4/WBLL/1/KUKUNA//TACUPETOF2001/3/UP2338*2/VIVITSI/5/SAUAL/MUTUS	-	Breeding line	CZ-PZ	IR-TS
104	JKW275	TUKURU//BAV92/RAYON/6/NG8201/KAUZ/4/SHA7	-	Breeding line	NW-NE	IR-TS
105	JKW278	SHA7//PRL/VEE#6/3/FASAN/4/HAAS8446/2*FASAN/5/CBRD/KAUZ/6/MILAN/AMSEL/7/FRET2*2/KUKUNA/8/TRAP#1/BOW/3/VEE/PJN//2*TUI/4/BAV92/RAYON/5/KACHU#1/9/COPIO	-	Breeding line	CZ-PZ	IR-TS
106	K1006	PBW343/HP1731	2014	Variety	NEPZ	IR-TS
107	K1317	K0307/K9162	2018	Variety	NEPZ	RF-TS
108	K1901	K9107/PBW343	-	Breeding line	NW-NE	IR-TS
109	K1903	HD2285/K9162	-	Breeding line	NW-NE	IR-TS
110	K1905	HD2329/PBW373	-	Breeding line	NW-NE	IR-TS
111	K1907	K9107/K9006	-	Breeding line	NW-NE	IR-LS
112	K1908	PBW550/K0307	-	Breeding line	NW-NE	IR-LS
113	KRL1803	VILLAJUAREZF2009/3/T.DICOCCONPI94625/AE.SQ(372)//3*PASTOR/4/WBLL1*2/BRAMBLING/5/BAJ #1/AKURI	-	Breeding line	NW-NE	IR-TS
114	KRL1808	KRS9383/KRL283	-	Breeding line	NW-NE	IR-TS
115	KRL1810	KRS9383/KRL283	-	Breeding line	NW-NE	IR-TS
116	LOK77	HW3064/HW2006/CPAN4078/HW2002/SS/C306/S331/LOK1/HW888	-	Breeding line	CZ-PZ	IR-LS
117	MACS6478	CS/TH.SC//3*VN/3/MIRLO/BUC/4/MILAN/5/TILHI	2014	Variety	PZ	IR-TS
118	MACS6747	MACS6222/HD2956	-	Breeding line	CZ	IR-TS
119	MACS6755	MACS2496/RAJ4037//DBW35	-	Breeding line	CZ-PZ	RI-TS
120	MACS6764	MACS6222/VL892//PBW589	-	Breeding line	CZ-PZ	IR-TS
121	MACS6768	MACS6221*2//Raj4037	-	Breeding line	CZ-PZ	IR-TS
122	MACS6774	WBLL1/KUKUNA//TACUPETO F2001/3/BAJ#1*2/4/KINGBIRD#1	-	Breeding line	CZ-PZ	IR-LS
123	MP1358	KACHU*2/MUNAL#1/K1215	2022	Variety	PZ	RI-TS
124	MP1361	CHEN/AE.SQ(TAUS)//BCN/3/BAV92/4/BERKUT/5/BAVIS/JWS140	-	Breeding line	CZ	IR-TS
125	MP1367	HI1450/HI1544	-	Breeding line	CZ-PZ	RI-TS
126	MP1368	MP1142/GW273	-	Breeding line	CZ-PZ	RI-TS
127	MP1369	GW475/BL908	-	Breeding line	CZ-PZ	RI-TS
128	MP1370	VL895/PHSO621	-	Breeding line	CZ-PZ	IR-TS
129	MP1371	MP3171/DL803-3	-	Breeding line	CZ-PZ	IR-TS
130	MP3288	DOVE/BUC/DL788-2	-	Breeding line	CZ	RI-TS
131	MP3523	MP3046/RAJ3777	-	Breeding line	CZ-PZ	RI-TS
132	MP3526	PFAU/MILAN/3/SKAUZ/KS94	-	Breeding line	CZ-PZ	IR-TS
133	MP3529	35 IBWSN159/DBW17	-	Breeding line	CZ-PZ	IR-LS
134	NIAW3170	SKOLL/ROLF07	2021	Variety	NWPZ	RI-TS
135	NIAW3851	BAVIS*2/NAVJ07	-	Breeding line	CZ-PZ	RI-TS
136	NIAW3855	TRCH*2//WHEAR/SOKOLL	-	Breeding line	CZ-PZ	RI-TS
137	NIAW3882	PAURAQ/KINGBIRD#1/6/FRET2/KUKUNA//FRET2/3/PARUS/5/FRET2*2/4/SNI/TRAP#1/3/KAUZ*2/TRAP//KAUZ	-	Breeding line	CZ-PZ	IR-TS
138	NIAW3889	TRCH/SRTU//KACHU*2/3/KINGBIRD #1	-	Breeding line	CZ-PZ	IR-TS
139	NIAW3898	KIRITATI//2*PRL/2*PASTOR/3/HUHWA1	-	Breeding line	CZ-PZ	IR-LS
140	NW7079	FRETZ/TUKURU//FRETZ/2/3/MUNIA/CHTO//AMSEL/4/FRETZ2/TUKURU//FRET2	-	Breeding line	NW-NE	IR-TS
141	NW7088	FRANCOLIN#1*2//ND643/2*WBLL1	-	Breeding line	NW-NE	IR-TS
142	NW7092	SERI.1B*2/3/KAUZ*2/BOW//KAUZ/5/CNO79//PF70354/MUS/3/PASTOR/4/BAV92/6/ND643/2*WBLL1	-	Breeding line	NW-NE	IR-LS
143	NW7093	DOY1/AE.SQUARROSA(447)/3/2*KA/NAC//TRCH	-	Breeding line	NW-NE	IR-TS
144	NW8000	HUW234+LR34/PRINIA//KIRITATI*2/3/KINGBIRD#1	-	Breeding line	NW-NE	IR-LS
145	NWS2176	KACHU//WBLL1*2/BRAMBLING	-	Breeding line	CZ-PZ	IR-TS
146	NWS2180	NS732/HER/3/PRL/SARA//TSI/VEE#5/4/FRET2/5/WHEAR/SOKOLL	-	Breeding line	CZ-PZ	IR-LS
147	PBW644	PBW175/HD2643	2012	Variety	NWPZ	RI-TS
148	PBW803	BWL0762/PBW621//HD3086	-	Breeding line	NWPZ	IR-TS
149	PBW804	SOKOLL/3/PASTOR//HXL7573/2*BAU/4/HUW234+LR34/PRINIA//PBW343*2/KUKUNA/3/ROLF07	-	Breeding line	NEPZ	IR-TS
150	PBW811	BECARD/2*FRNCLN	-	Breeding line	NWPZ	IR-LS
151	PBW812	BWL0762/PBW621//HD3086	-	Breeding line	NWPZ	IR-LS
152	PBW813	KRICHAUFF/4/2*BW9250*3//YR10/6*AVOCET/3/BW 9250*3//YR15/6*AVOCET	-	Breeding line	NWPZ	IR-LS
153	PBW826	WBLL1*2/KKTS//PASTOR/KUKUNA/3/KINGBIRD #1// INQALAB 91*2/TUKURU/5/KAUZ//ALTAR 84/AOS/3/ MILAN/KAUZ/4/SAUAL	-	Breeding line	NW-NE	IR-TS
154	PBW827	PBW677/PBW703	-	Breeding line	NW-NE	IR-TS
155	PBW828	HD3122/HD3121	-	Breeding line	NW-NE	IR-TS
156	PBW829	YR5/6*AVOCET//2*DBW 17	-	Breeding line	NW-NE	IR-TS
157	PBW830	ACIENDA/2*PBW683	-	Breeding line	NW-NE	IR-TS
158	PBW831	PULSAR/2*PBW683	-	Breeding line	NW-NE	IR-TS
159	PBW832	BWL2752/BWL3549//BWL2763/BWL1800	-	Breeding line	CZ-PZ	IR-TS
160	PBW833	BWL0762/PBW621//HD3086	-	Breeding line	NW-NE	IR-LS
161	PBW834	GLADIUS/5/2*W15.92/4/PASTOR//HXL7573/2*BAU/3/WBLL1	-	Breeding line	NW-NE	IR-LS
162	PBW836	BWL0773/5/SIRKKU/PRINIA/4/CLC89//ESDA/KAUZ/3/BJY/COC/6/BWL2760	-	Breeding line	NW-NE	IR-LS
163	PBW838	BECARD #1/4/SOKOLL/3/PASTOR// HXL7573/2*BAU	-	Breeding line	NW-NE	RI-TS
164	PBW840	WL711-AE.TRIUNCIALISIL/4*PBW550/4/WL711-AE.OVATA/CS(S)//WL711NN/3/4*PBW550	-	Breeding line	NWPZ	IR-TS
165	PBW841	PBW621//HD2967/BWL3558	-	Breeding line	NW-NE	IR-TS
166	RAJ4083	PBW 343/UP 2442//WR 258/UP 2425	2007	Variety	PZ	IR-LS
167	RAJ4547	TUJAR	-	Breeding line	NW-NE	IR-TS
168	RAJ4553	PBW65/2*PASTOR	-	Breeding line	NW-NE	IR-LS
169	RAJ4554	SHATABDI/NAC/PBW636	-	Breeding line	NW-NE	IR-LS
170	RVW4301	MACS6222/GW173	-	Breeding line	CZ-PZ	IR-TS
171	RVW4304	PBW703/HW2046	-	Breeding line	CZ-PZ	IR-TS
172	RVW4309	DBW18/Gladius	-	Breeding line	CZ-PZ	IR-LS
173	SKW356	SEL-VL968	-	Breeding line	NHZ	RF-TS
174	TAW155	MUTUS/AKURI#1//MUTUS	-	Breeding line	CZ	IR-TS
175	UAS3008	HI977/PBW343/DBW14	-	Breeding line	PZ	IR-LS
176	UAS3011	UAS305/UAS315	-	Breeding line	CZ-PZ	IR-TS
177	UAS3012	CNO79//PF70354/MUS/3/PASTOR/4/BAV92/5/FRET2/KUKUNA//FRET2/6/MILAN/KAUZ//PRINIA/3/BAV92	-	Breeding line	CZ-PZ	IR-TS
178	UAS3013	KIRITATI/WBLL1//FRANCOLIN #1	-	Breeding line	CZ-PZ	IR-LS
179	UAS3014	UAS316/(MUTUS//ND643/2*WBLL1)	-	Breeding line	CZ-PZ	RI-TS
180	UP3033	NIAW1544/UP2763	-	Breeding line	NWPZ	IR-LS
181	UP3051	PBW658/PBW670	-	Breeding line	NW-NE	IR-TS
182	UP3053	PBW658/PBW670	-	Breeding line	NW-NE	IR-TS
183	UP3054	NELOKI//SOKOLL/EXCALIBUR	-	Breeding line	NW-NE	IR-TS
184	UP3057	TACUPETOF2001/BRAMBLING/5/NAC/TH.AC//3*PVN/3/MIRLO/BUC/4/2*PASTOR*2/6/TRCH/SRTU//KACHU	-	Breeding line	NW-NE	IR-TS
185	UP3058	QLD28/DPW621-50//WH1138	-	Breeding line	CZ-PZ	IR-TS
186	UP3059	ATTILA/3*BCN//BAV92/3/TILHI/5/BAV92/3/PRL/SARA//TSI/VEE#5/4/CROC_1/AE.SQUARROSA(224)//2*OPATA//DBW 102	-	Breeding line	NW-NE	IR-LS
187	UP3060	D67.2/PARANA66.270//AE.SQ(320)/3/CUNNINGHAM/4/PASTOR/SLVS/5/SUNCO/2*PASTOR// EXCALIBUR/6/MTRWA92.161/PRINIA/5/SERI*3//RL6010/4*YR	-	Breeding line	NW-NE	IR-LS
188	UP3062	QLD28/PBW621	-	Breeding line	NW-NE	RI-TS
189	UP3064	RAJ3765/HD3121	-	Breeding line	NW-NE	RI-TS
190	UP3069	VHW6278P-9	-	Breeding line	NHZ	RI-LS
191	VL2039	RL6043/4*NAC//PASTOR/3/BABAX/VL892	-	Breeding line	NHZ	RF-TS
192	VL2040	SERI.1B//KAUZ/HEVO/3/AMAD/4/PYN/BAU//MILAN/5/ OPATA/RAYON//KAUZ	-	Breeding line	NHZ	RF-TS
193	VL2041	NESSER/SAULSKU32/MACS6240//HS507	-	Breeding line	NHZ	RF-TS
194	VL2042	TX71A983.4/TX69D4812//PYN/3/VPM/MOS83.11.4-8//PEW/HSB3177(Yr15+Yr24)/6*Avocet//2*BAXTER/FLW13	-	Breeding line	NHZ	RF-TS
195	VL3022	SW89-3218//AGRI/NAC/HS507//QLD 39	-	Breeding line	NHZ	RI-LS
196	VL3023	PHS822/ISFRA	-	Breeding line	NHZ	RI-LS
197	VL892	WH542/PBW226	2008	Variety	NHZ	RI-LS
198	WH1021	NYOT95/SONAK	2008	Variety	NWPZ	IR-LS
199	WH1105	MILAN/S87230//BABAX	2013	Variety	NWPZ	IR-TS
200	WH1252	SOKOLL/WBLL1/4/D67.2/PARANA66.270//AE.SQ(320)/3/CUNNINGHAM	-	Breeding line	NWPZ	IR-TS
201	WH1264	P12256/P12332//WH1142	-	Breeding line	NWPZ	IR-LS
202	WH1270	SHA7//PRL/VEE#6/3/FASAN/4/HAAS8446/2*FASAN/5/CBRD/KAUZ/6/MILAN/AMSEL/7/FRET2*2/KUKUNA/8/2*WHEAR/SOKOLL	2021	Variety	NWPZ	IR-ES
203	WH1271	MILAN/S87230//BAV92*2/3/AKURI	-	Breeding line	NW-NE	IR-TS
204	WH1273	WH711/LASSIK	-	Breeding line	NW-NE	IR-TS
205	WH1274	BAJ#1/SUP152	-	Breeding line	NW-NE	IR-TS
206	WH1275	FRET2/KIRITATI/5/NAC/TH.AC//3*PVN/3/MIRLO/BUC/4/2*PASTOR*2/6/PVN	-	Breeding line	NW-NE	IR-TS
207	WH1276	P13428/P13471	-	Breeding line	NW-NE	IR-LS
208	WH1277	SOKOLL/WBLL1/4/D67.2/PARANA 66.270//AE.SQ(320)/3/CUNNINGHAM	-	Breeding line	NW-NE	IR-LS
209	WH1278	SHORTENEDSR26TRANSLOCATION//2*WBLL1*2/KKTS/3/BECARD	-	Breeding line	NW-NE	IR-LS
210	WH1279	SOKOLL/3/PASTOR//HXL7573/2*BAU/4/GLADIUS	-	Breeding line	CZ-PZ	IR-LS
211	WH1280	PBW65/2*PASTOR	-	Breeding line	NW-NE	RI-TS
212	WH1281	TACUPETOF2001/BRAMLING/5/NAC/TH.AC//3*PVN/3/MIRLO	-	Breeding line	NW-NE	RI-TS
213	WH1283	P13352/PBW343//WH711/3/PBW550	-	Breeding line	NWPZ	IR-TS
214	WH1284	MILAN/S87230//BAV92*2/3/AKURI	-	Breeding line	NWPZ	IR-TS
215	HPW474	S308/HD29P2	-	Breeding line	NHZ	RI-LS
216	VL3024	ZANDER33/VL907//QLD40	-	Breeding line	NHZ	RI-LS
217	DBW291	EC609395/PBW639	-	Breeding line	NWPZ	IR-LS
218	JAUW672	SERI.18*2/3/KAUZ*2/BOW//KAUZ/4/CROC	-	Breeding line	NWPZ	RI-TS
219	RAJ4541	RWP2008-31/Raj4188	-	Breeding line	CZ	IR-TS
220	MP3336	HD 2402/GW 173	2013	Variety	CZ	IR-LS
221	HI1633	GW322/PBW498	2021	Variety	PZ	IR-LS
222	HI1641	HI1544/RAJ3777	-	Breeding line	PZ	IR-LS
223	HI1642	CAPAN4068/MACS2496	-	Breeding line	PZ	IR-LS
224	MACS6752	PBW553/RAJ4083	-	Breeding line	PZ	IR-LS
225	MACS6749	MACS6221/Raj4037	-	Breeding line	PZ	IR-LS
226	HD3353	HD3043/HI1500	-	Breeding line	NW-NE	IR-TS
227	DBW306	TacupetoF2001*2/Brambling//Blouk#1	-	Breeding line	NW-NE	IR-TS
228	DBW308	HD3108/HD2967	-	Breeding line	NW-NE	IR-TS
229	DBW309	LOK62/PBW65/2*Pastor	-	Breeding line	NW-NE	IR-TS
230	DBW334	PF?4354//LD/ALD/4/2*BR12*2/3/JUP//PAR214*6/F86631/5/NL750/6/BOW//BUC/B UL/3/WEAVER/4/STAR	-	Breeding line	NW-NE	IR-TS
231	RAJ4546	SHATABDI/NAC/PBW636	-	Breeding line	NW-NE	IR-TS
232	RAJ4548	GLADIUS/5/2*W15.92/4/ PASTOR//HXL 7573 /2*BAU/3/WBLL1	-	Breeding line	NW-NE	IR-TS
233	WH1272	P12968/WH1130//P12892/3/UP2338	-	Breeding line	NW-NE	IR-TS
234	UP3052	WH1142/UP2748	-	Breeding line	NW-NE	IR-TS
235	RAJ4549	PBW373/HD3058	-	Breeding line	NW-NE	IR-TS
236	RAJ4550	VL898/PBW631	-	Breeding line	NW-NE	IR-TS
237	K1904	K0307/K8434	-	Breeding line	NW-NE	IR-TS
238	UP3055	PBW658/PBW670	-	Breeding line	NW-NE	IR-TS
239	UP3056	QLD28/HW2019//DBW102	-	Breeding line	NW-NE	IR-TS
240	BRW3869	VHW4579/K0307	-	Breeding line	NW-NE	IR-TS
241	HUW841	PBW343*2/KUKUNA//PBW343*2/KUKUNA/3/	-	Breeding line	NW-NE	IR-TS
242	AAI-W22	ESW16/GIANT-3	-	Breeding line	NW-NE	IR-TS
243	DBW315	HD2967*2/Kharchia65	-	Breeding line	CZ-PZ	IR-TS
244	RAJ4551	HD2964/WH1105	-	Breeding line	CZ-PZ	IR-TS
245	MP3535	BABAX/LR42//BABAX/3/ER2000/8/BOW/VEE/5/ND/VG9144//KAL/BB/3/YACO/4/CHIL/6/CASKOR/3/CROC_1/AE.SQUARROSA(224)//OPATA/7/PASTOR//MILAN/KAUZ/3/BAV92	-	Breeding line	CZ-PZ	IR-TS
246	HD3365	HD3065/HD3086	-	Breeding line	NW-NE	IR-LS
247	DBW317	K307/NEPAL05	-	Breeding line	NW-NE	IR-LS
248	DBW318	DBW42/DBW90	-	Breeding line	NW-NE	IR-LS
249	RAJ4552	VEE7KAUZ/PFAU/MILAN/3/MILAN/PASTOR	-	Breeding line	NW-NE	IR-LS
250	PBW835	BWL2760/BWL1879//BWL2752/BWL1797	-	Breeding line	NW-NE	IR-LS
251	UP3061	PASTOR/4/BAV92	-	Breeding line	NW-NE	IR-LS
252	UP3065	VHW6281P-2	-	Breeding line	NW-NE	IR-LS
253	HD3366	PBW343/HD2947//IC296762	-	Breeding line	CZ-PZ	IR-LS
254	HD3367	MP3288/K0911	-	Breeding line	CZ-PZ	IR-LS
255	HI1652	BOW/BUC//BUL/3/CLRP6/HW3034	-	Breeding line	CZ-PZ	IR-LS
256	MP3527	MP3325/WAS515	-	Breeding line	CZ-PZ	IR-LS
257	GW527	VL826/KAUZ/3/KAUZ/4/HD2882	-	Breeding line	CZ-PZ	IR-LS
258	PBW837	WL711-AE.TRIUNCIALISIL/4*PBW550/4/WL711-AE.OVATA/CS(S)//WL711NN/3/4*PBW550	-	Breeding line	CZ-PZ	IR-LS
259	NIAW3895	ATTILA*2/HUITES//FINSI/3/ATTILA*2/PBW65/4/TRCH/SRTU//KACHU	-	Breeding line	CZ-PZ	IR-LS
260	MP1372	MP4010/MP1142	-	Breeding line	CZ-PZ	IR-LS
261	MACS6769	RAJ4083/NIAW917	-	Breeding line	CZ-PZ	IR-LS
262	HD3369	HD3070/HD3078	-	Breeding line	NW-NE	RI-TS
263	DBW323	TILHI/SOKOLL/4/2*ATTILA*2/PBW65/PIHA/3/ATTILA/2*PASTOR	-	Breeding line	NW-NE	RI-TS
264	DBW324	DBW87/MP1250	-	Breeding line	NW-NE	RI-TS
265	NW7096	SHA7//PRL/VEE#6/3/FASAN/4/HAAS8446/2*FASAN/5/CBRD/KAUZ/6/MILAN/AMSEL/7/FRET2*2/KUKUNA/8/2*WHEAR/SOKOLL	-	Breeding line	NW-NE	RI-TS
266	JAUW683	PBW175/DBSYT421	-	Breeding line	NW-NE	RI-TS
267	PBW839	BWL0783/BWL0059	-	Breeding line	NW-NE	RI-TS
268	PBW848	CROC_1AE.SQ(224)//OPATA/3/PASTOR/4/2*SOKOLL/3/PASTOR//HXL7573/2*BAU	-	Breeding line	NW-NE	RI-TS
269	BRW3863	HUW237/CHIRYA7	-	Breeding line	NW-NE	RI-TS
270	BCW5	C306/HD2967	-	Breeding line	NW-NE	RI-TS
271	HD3372	KINDE*2/4/T.DICOCCOMPI94625/AE.SQUARROSA(372)//TUI/CLMS/3/2*PASTOR/5/WAXBI/6/BAJ #1/AKURI	-	Breeding line	CZ-PZ	RI-TS
272	HI1655	MACS2496/HI1531	-	Breeding line	CZ-PZ	RI-TS
273	AKAW5088	DSS-06-966-5	-	Breeding line	CZ-PZ	RI-TS
274	MACS6753	MACS6221//RAJ4037*2	-	Breeding line	CZ-PZ	RI-TS
275	DBW330	CHWWINK#1/3/MILAN/S87230	-	Breeding line	NWPZ	IR-ES
276	DBW173	KAUZ/AA//KAUZ//PBW602	2018	Variety	NWPZ	IR-LS
277	DBW187	NAC/TH.AC//3*PVN/3/MIRLO/BUC/4/2*PASTOR/5/KACHU/6/KACHU	2019	Variety	NW-NE	IR-TS
278	MACS6222	HD2189*2/MACS2496	2010	Variety	PZ	IR-TS
279	WH1124	MUNIA/CHTO//AMSEL	2014	Variety	NWPZ	IR-LS
280	WH1142	OEN/Ae.Sq.(TAUS)/FCT/3/2*WEAVER	2015	Variety	NWPZ	RI-TS
	Abbreviations	Full name
	NHZ	Northern Hills Zone
	NWPZ	North Western Plains Zone
	NEPZ	North Eastern Plains Zone
	CZ	Central Zone
	PZ	Peninsular Zone
	NW-NE	North Western and Eastern Plains Zone
	CZ-PZ	Central Peninsular Zone
	IR-TS	Irrigated timely sown
	IR-LS	Irrigated late sown
	RI-TS	Restricted irrigation timely sown
	RF-TS	Rainfed Timely sown
	RI-LS	Restricted irrigation late sown
